# Supplementary material for: Flexible Porous Silicon/Carbon Fiber Anode for High−Performance Lithium−Ion Batteries
Source: MDPI journal article supplement (doi:10.3390/ma15093190), 2022-04-28
Supplement: s1 [file s1]

# Flexible Porous Silicon/Carbon Fiber Anode for High-Performance Lithium-Ion Batteries

Gang Liu <sup>1,†</sup>, Xiaoyi Zhu <sup>1,†</sup>, Xiaohua Li <sup>2</sup>, Dongchen Jia <sup>1</sup>, Dong Li <sup>1</sup>, Zhaoli Ma <sup>3</sup> and Jianjiang Li <sup>1,\*</sup>

<sup>1</sup> School of Environmental Science and Engineering, Qingdao University, No. 308, Ningxia Road, Qingdao 266071, China; 2019025785@qdu.edu.cn (G.L.); xyzhu@qdu.edu.cn (X.Z.); 2020025847@qdu.edu.cn (D.J.); 2019205603@qdu.edu.cn (D.L.)

<sup>2</sup> School of Material Science and Engineering, Qingdao University, No. 308, Ningxia Road, Qingdao 266071, China; 2019020442@qdu.edu.cn

<sup>3</sup> School of Chemical Experimental Teaching Center, Qingdao University, No. 308, Ningxia Road, Qingdao 266071, China; zlma@qdu.edu.cn

\* Correspondence: lj@qdu.edu.cn

† These authors contributed equally to this work.

## Characterizations

The phases and crystallinity of composites were characterized via X-ray diffraction (XRD; DX-2007) using Cu K $\alpha$  radiation ( $\lambda = 1.5418 \text{ \AA}$ ). Thermogravimetric analysis (TGA4000) (NSK LTD, Tokyo, Japan) was performed at a heating rate of  $10 \text{ }^\circ\text{C min}^{-1}$  under air flow. Raman spectroscopy (Jobin Yvon HR800) (Renishaw, London, UK) was conducted to confirm the formation of carbon. A scanning electron microscope (SEM; JSM-6700F) with an energy-dispersive X-ray spectrometer (EDS; IE300X) at 15 kV and a transmission electron microscope (TEM; JEM-2100F) (JEOL, Tokyo, Japan) were applied to characterize the morphologies of samples. The microstructure and morphology of the materials were detected by JSM-6700F scanning electron microscopy (SEM) (JEOL, Tokyo, Japan), IE300X energy dispersive X-ray spectrometer and JEM-2100F transmission electron microscopy (JEOL, Tokyo, Japan). X-ray photoelectron spectroscopy (XPS) curves on the surface of nanomaterials were analyzed using Electron spectrometer (ESCALab250) (Thermo Fay, Boston, MA, USA).

## Electrochemical Measurements

The electrode was cut into disks with a diameter of 1 cm (the mass loading is  $1.40 \text{ mg cm}^{-2}$ ) were first transferred to a vacuum oven, dried at  $120 \text{ }^\circ\text{C}$  for 12 hours, and then transferred to a glove box filled with argon gas containing oxygen and water content less than 0.1 PPM. Then the electrochemical performance was tested with coin-type cells (CR2016) fabricated in it to test the electrode performance by using polypropylene films as separators (the thickness of the separator was  $25 \text{ }\mu\text{m}$ ) to separate the working and counter electrodes (lithium wafer) in an electrolyte. The liquid electrolyte was  $1 \text{ mol L}^{-1} \text{ LiPF}_6$  in a mixture of ethylene carbonate and dimethyl carbonate (1:1,  $v/v$ ). The galvanostatic cycling measurements were conducted by a CT 2001A battery tester at determinate voltage windows. Cyclic voltammogram (CV) tests were performed by using an electrochemical workstation within a fixed voltage range and scan rate.

## Supporting Figures

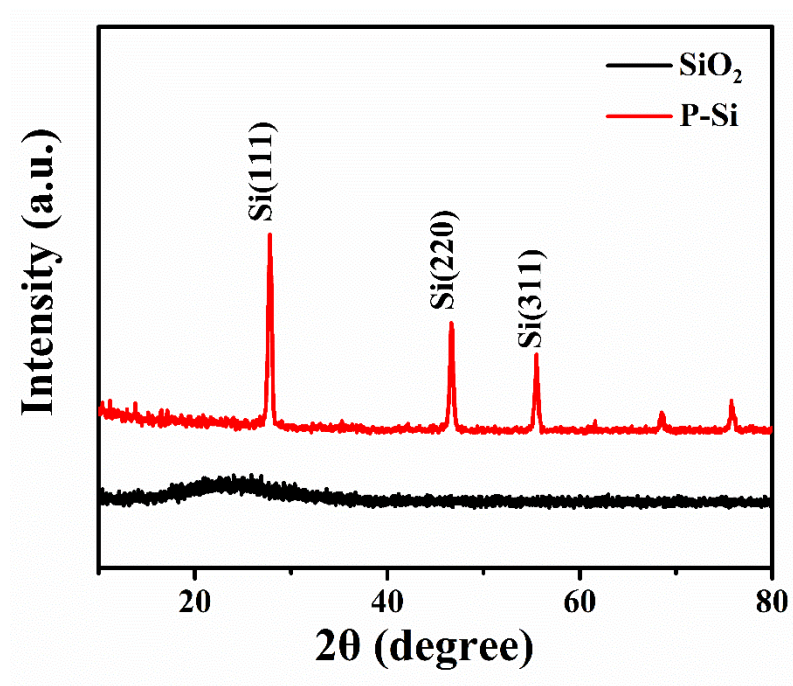

Figure S1. The X-ray diffraction (XRD) patterns of  $\text{SiO}_2$  and P-Si.

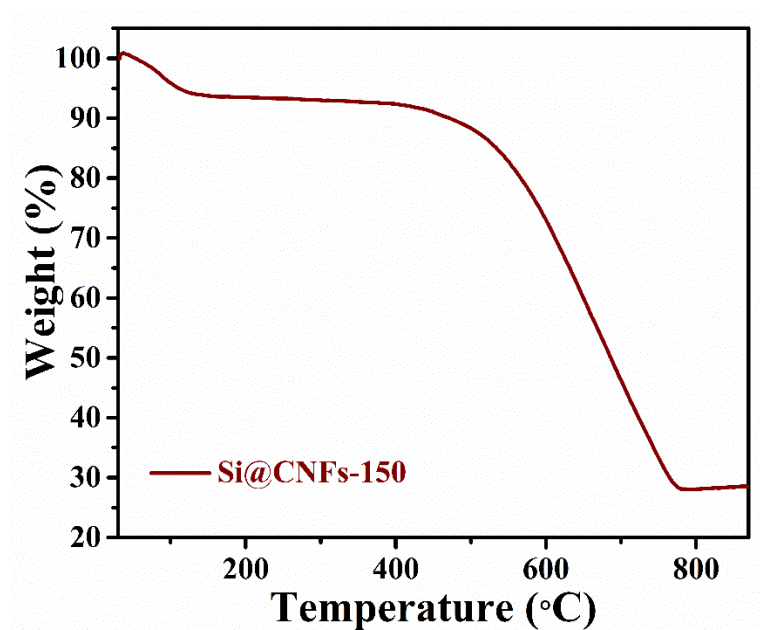

Figure S2. TGA curves of Si@CNFs-150.

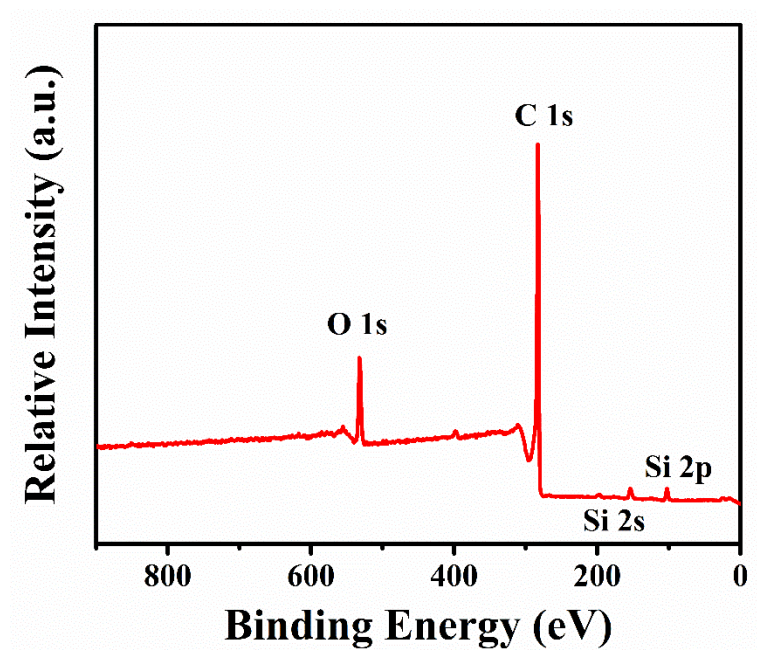

Figure S3. The survey XPS spectra of P-Si@CNFs-150.

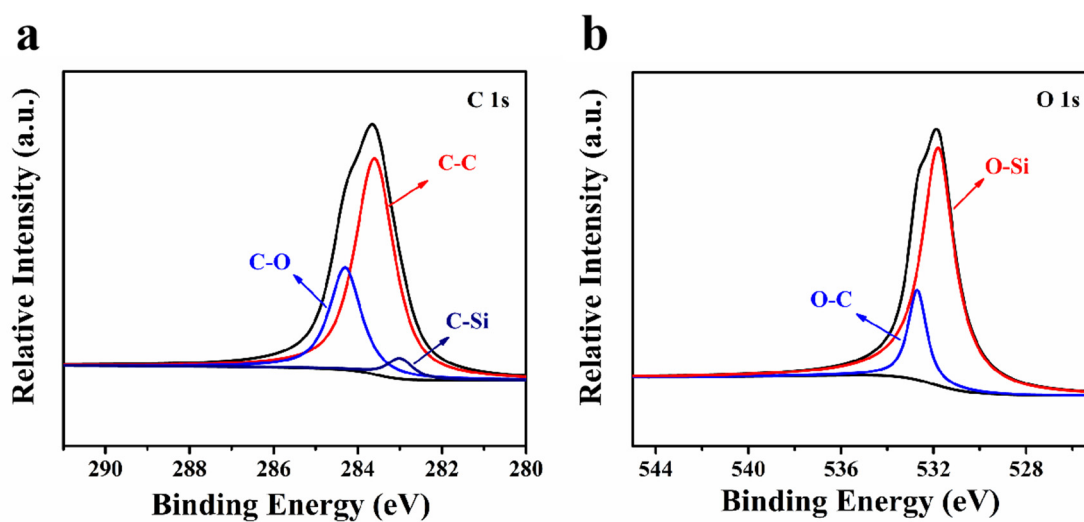

Figure S4. XPS spectra of C 1s (a) and O 1s (b) of P-Si@CNFs-150.

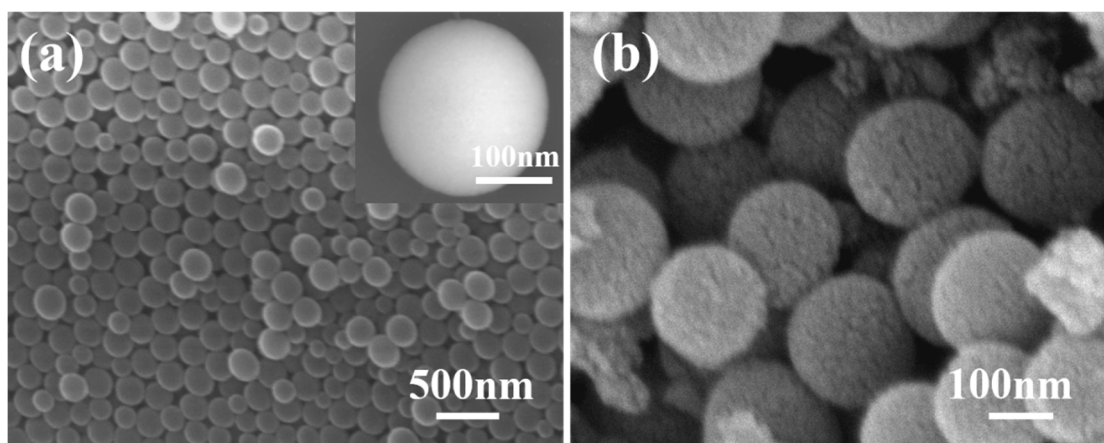

Figure S5. The SEM images of SiO<sub>2</sub> (a) and P-Si (b).

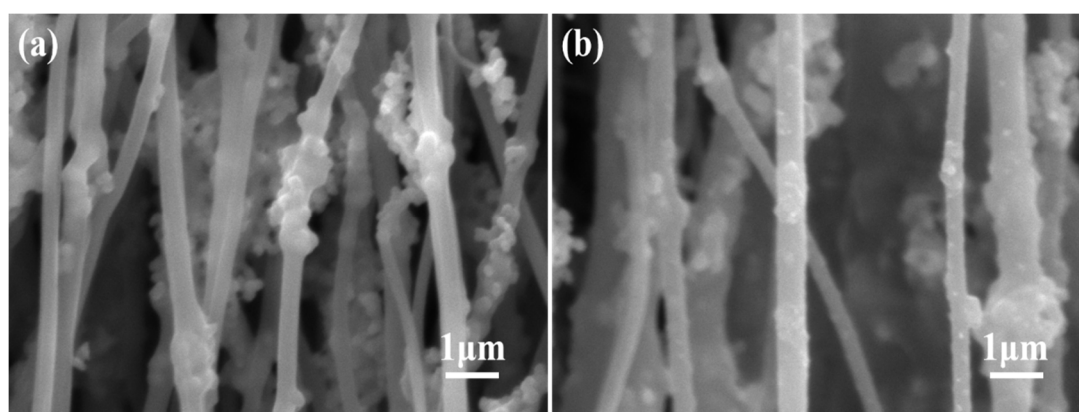

**Figure S6.** The SEM images of Si@CNFs-150 (a,b) under different magnifications.

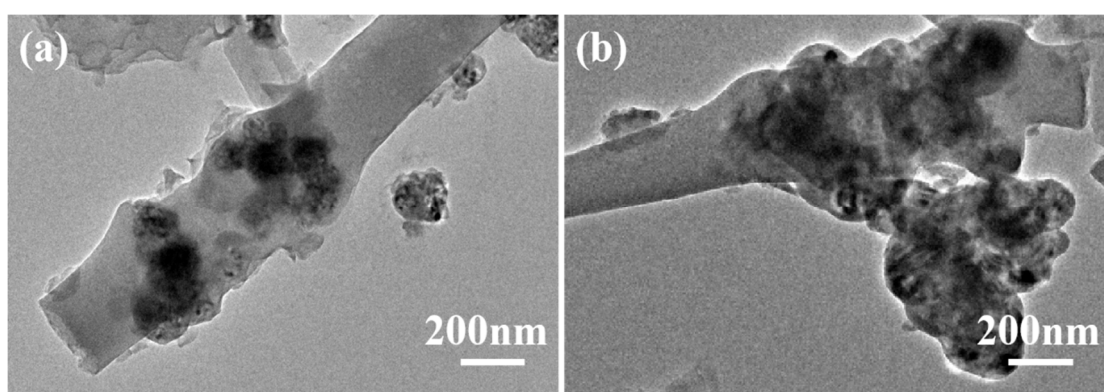

**Figure S7.** The TEM images of Si@CNFs-150 (a,b) under different magnifications.

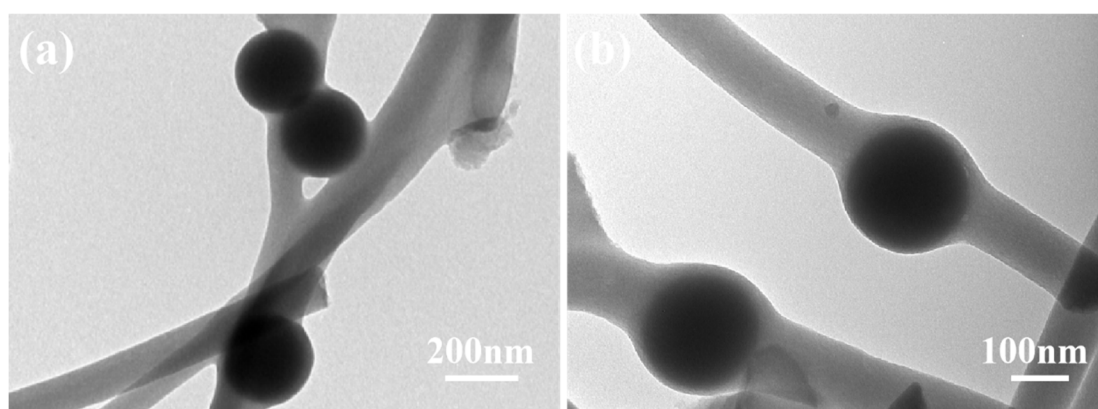

**Figure S8.** The TEM images of SiO<sub>2</sub>@CNFs (a,b) under different magnifications.



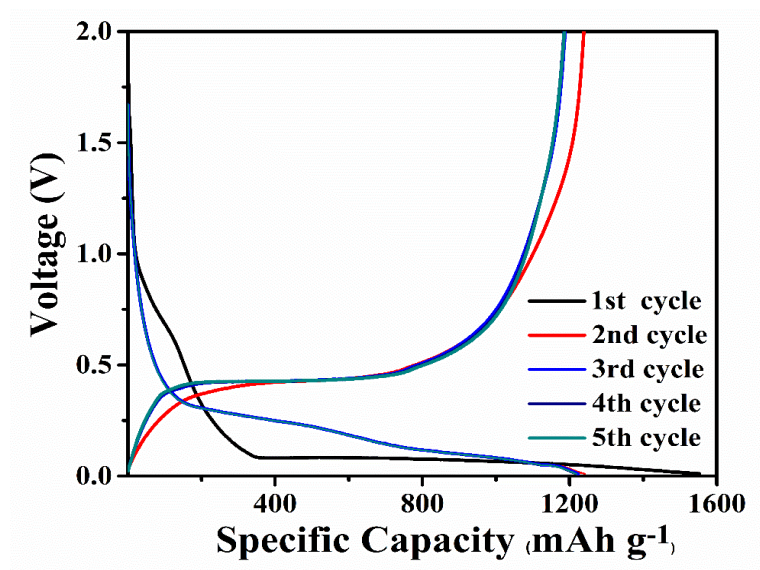

Figure S9. The charge and discharge curve of P-Si@CNFs-150 from the first to the fifth cycles.

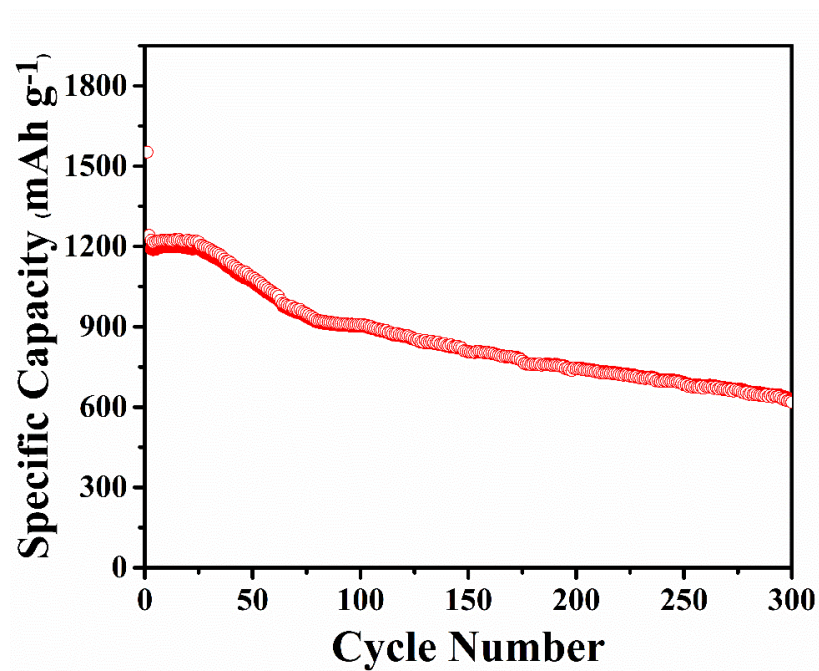

Figure S10. Cycle performance of P-Si@CNFs-150 at 100 mA g<sup>-1</sup> after 300 cycles.

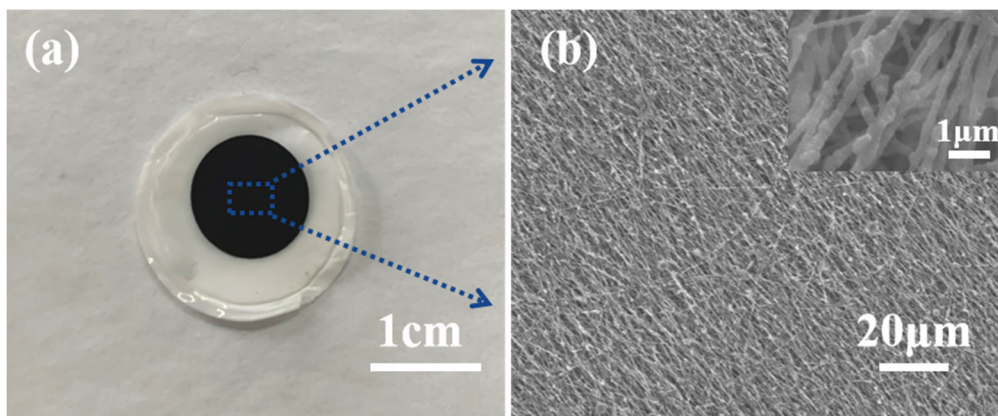

Figure S11. Electrode photo (a), and SEM image (b) of P-Si@CNFs-150 after 300 cycling.

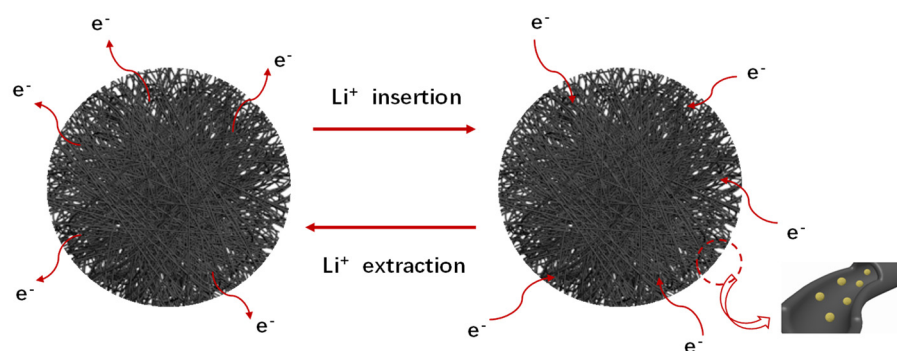

Figure S12. The schematic illustration of lithiation and delithiation processes.

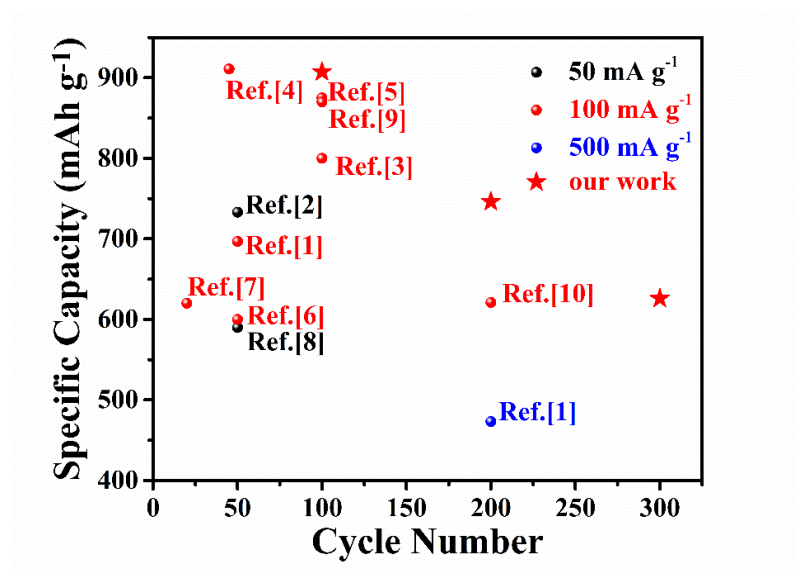

Figure S13. Comparison of flexible binder-free Si/C anodes reported for LIBs.

### Supporting Tables

Table S1. Synthesis conditions and nomenclature of the samples.

| Entry | Content (mg)                | DMF/PAN (g) | Temperature (°C) | Sample                     |
|-------|-----------------------------|-------------|------------------|----------------------------|
| 1     | 100                         | 4.5/0.5     | 850              | P–Si@CNFs–100              |
| 2     | 150                         | 4.5/0.5     | 850              | P–Si@CNFs–150              |
| 3     | 200                         | 4.5/0.5     | 850              | P–Si@CNFs–200              |
| 4     | 150 (Si NPs~80nm)           | 4.5/0.5     | 850              | Si@CNFs–150                |
| 5     | 150 (SiO <sub>2</sub> TEOS) | 4.5/0.5     | 850              | SiO <sub>2</sub> @CNFs–150 |

Table S2. The Brunauer–Emmett–Teller (BET) surface area, pore volume and average pore size of P–Si@CNFs–150 and Si@CNFs–150.

| Sample                                         | P–Si@CNFs–150 | Si@CNFs–150 |
|------------------------------------------------|---------------|-------------|
| Surface area (m <sup>2</sup> g <sup>−1</sup> ) | 261.67        | 229.35      |
| Pore volume (cm <sup>3</sup> g <sup>−1</sup> ) | 0.087         | 0.067       |
| Average pore size (nm)                         | 3.097         | 4.988       |
